# Supplementary material for: Evaluation of Pesticide Residues Occurrence in Random Samples of Organic Fruits and Vegetables Marketed in Poland
Source: MDPI journal article supplement (doi:10.3390/foods11131963), 2022-07-01
Supplement: s1 [file s1]

# Evaluation of Pesticide Residues Occurrence in Random Samples of Organic Fruits and Vegetables Marketed in Poland

Renata Kazimierczak <sup>1,\*</sup>, Dominika Średnicka-Tober <sup>1</sup>, Jan Golba <sup>2</sup>, Anna Nowacka <sup>3</sup>,  
Agnieszka Hołodyńska-Kulas <sup>3</sup>, Klaudia Kopczyńska <sup>1</sup>, Rita Góralska-Walczak <sup>1</sup> and Bogusław Gnusowski <sup>3</sup>

<sup>1</sup> Department of Functional and Organic Food, Institute of Human Nutrition Sciences, Warsaw University of Life Sciences, Nowoursynowska 159c, 02-776 Warsaw, Poland; dominika\_srednicka\_tober@sggw.edu.pl (D.Ś.-T.); klaudia\_kopczynska@sggw.edu.pl (K.K.); rita\_goralska\_walczak@sggw.edu.pl (R.G.-W.)

<sup>2</sup> Organic Farming and Food Quality Department, Ministry of Agriculture and Rural Development, Wspólna 30, 00-930 Warsaw, Poland; jan.golba@gmail.com

<sup>3</sup> Institute of Plant Protection—National Research Institute, Władysława Węgorka 20, 60-318 Poznań, Poland; a.nowacka@iorpib.poznan.pl (A.N.); a.holodynska@iorpib.poznan.pl (A.H.-K.); b.gnusowski@op.pl (B.G.)

\* Correspondence: renata\_kazimierczak@sggw.edu.pl; Tel.: +48-22-593-7035

**Table S1.** Multiple reaction monitoring (MRM) conditions of each target pesticide for LC-MS/MS analysis.

| Mass Spectrometer         | AB Sciex QTRAP 6500 LC-MS/MS system                                        |               |                       |                     |                     |                      |
|---------------------------|----------------------------------------------------------------------------|---------------|-----------------------|---------------------|---------------------|----------------------|
| Ionization                | Positive Electrospray Ionization, ESI+ (Multiple Reaction Monitoring Mode) |               |                       |                     |                     |                      |
| Target compound           | Quantification                                                             | Qualification | RT <sup>1</sup> (min) | DP <sup>2</sup> (V) | CE <sup>3</sup> (V) | CXP <sup>4</sup> (V) |
| 3-Hydroxycarbofuran       | 238.1>181.1                                                                | 238.1>163.0   | 6.96                  | 46/46               | 17/21               | 10/10                |
| Acephate                  | 184.0>143.0                                                                | 184.0>95.0    | 1.20                  | 26/26               | 13/33               | 8/14                 |
| Acetamiprid               | 223.0>125.9                                                                | 223.0>99.0    | 7.06                  | 80/80               | 27/51               | 6/5                  |
| Acibenzolar-S-methyl      | 211.0>136.0                                                                | 211.0>91.0    | 13.53                 | 96/96               | 39/28               | 8/11                 |
| Aldicarb                  | 208.1>116.1                                                                | 208.1>89.0    | 8.21                  | 26/26               | 11/21               | 8/14                 |
| Aldicarb-sulfone          | 223.1>148.0                                                                | 223.1>86.0    | 3.08                  | 36/36               | 13/23               | 8/14                 |
| Aldicarb-sulfoxide        | 207.0>132.0                                                                | 207.0>88.9    | 2.62                  | 36/36               | 11/21               | 8/10                 |
| Ametryn                   | 228.1>186.0                                                                | 228.1>96.0    | 12.22                 | 86/86               | 25/33               | 10/14                |
| Amidosulfuron             | 370.0>261.0                                                                | 370.0>218.0   | 11.46                 | 25/25               | 19/33               | 14/12                |
| Aminocarb                 | 209.1>137.1                                                                | 209.1>152.1   | 2.23                  | 56/56               | 33/19               | 8/10                 |
| Atrazine                  | 216.1>174.0                                                                | 216.1>104.0   | 12.16                 | 51/51               | 23/37               | 10/12                |
| Azaconazole               | 300.0>159.0                                                                | 300.0>231.0   | 12.89                 | 86/86               | 37/23               | 10/12                |
| Azoxystrobin              | 404.1>371.9                                                                | 404.1>344.0   | 14.77                 | 61/61               | 19/33               | 20/18                |
| Benalaxyl                 | 326.1>148.1                                                                | 326.1>208.2   | 17.13                 | 76/76               | 27/21               | 8/12                 |
| Bendiocarb                | 224.1>167.1                                                                | 224.1>109.0   | 10.35                 | 36/36               | 13/23               | 10/8                 |
| Bensulfuron-methyl        | 411.0>149.0                                                                | 411.0>118.9   | 14.02                 | 101/101             | 27/57               | 8/12                 |
| Benthiavalicarb-isopropyl | 382.1>180.0                                                                | 382.1>116.0   | 15.30                 | 91/91               | 41/27               | 10/6                 |
| Benzoximate               | 364.0>199.0                                                                | 364.0>104.9   | 17.85                 | 56/56               | 13/35               | 10/12                |
| Bifenazate                | 301.1>170.0                                                                | 301.1>151.9   | 15.66                 | 76/76               | 27/55               | 10/8                 |
| Bitertanol                | 338.0>269.0                                                                | 338.0>70.0    | 17.71                 | 50/50               | 15/25               | 16/16                |
| Boscalid                  | 343.0>307.0                                                                | 343.0>140.0   | 14.72                 | 116/116             | 27/25               | 16/8                 |
| Bromacil                  | 261.0>204.9                                                                | 261.0>187.9   | 9.96                  | 36/36               | 19/37               | 12/10                |
| Bromuconazole             | 378.0>159.0                                                                | 378.0>70.0    | 15.14/16.03           | 91/91               | 35/61               | 10/8                 |
| Bupirimate                | 317.1>166.1                                                                | 317.1>108.1   | 15.54                 | 91/91               | 31/33               | 10/8                 |
| Buprofezin                | 306.1>201.1                                                                | 306.1>116.1   | 18.70                 | 51/51               | 17/21               | 10/6                 |
| Butafenacil               | 492.1>331.0                                                                | 492.1>180.0   | 16.03                 | 46/46               | 33/57               | 18/10                |
| Butoxycarboxim            | 223.1>106.0                                                                | 223.1>166.1   | 2.89                  | 40/40               | 11/15               | 6/8                  |
| Buturon                   | 237.0>84.0                                                                 | 237.0>125.9   | 12.55                 | 91/91               | 21/39               | 14/6                 |
| Cadusafos                 | 271.0>158.9                                                                | 271.0>130.9   | 17.93                 | 36/36               | 19/31               | 10/6                 |
| Carbaryl                  | 202.1>145.1                                                                | 202.1>127.1   | 11.08                 | 21/21               | 15/39               | 8/8                  |
| Carbendazim               | 192.0>160.1                                                                | 192.0>132.1   | 4.13                  | 71/71               | 27/43               | 10/8                 |
| Carbetamide               | 237.1>192.1                                                                | 237.1>118.1   | 9.36                  | 36/36               | 13/17               | 12/6                 |
| Carbofuran                | 222.1>165.1                                                                | 222.1>123     | 10.42                 | 16/16               | 17/29               | 10/6                 |
| Carboxine                 | 236.1>143.0                                                                | 236.1>87.0    | 10.85                 | 16/16               | 21/31               | 10/10                |
| Carfentrazone-ethyl       | 412.0>345.9                                                                | 412.0>365.9   | 16.77                 | 126/126             | 33/25               | 18/20                |
| Chlorbromuron             | 292.9>204.0                                                                | 292.9>182.0   | 14.14                 | 51/51               | 28/25               | 10/9                 |
| Chloridazon               | 222.0>104.0                                                                | 222.0>92.0    | 6.61                  | 11/11               | 31/33               | 12/14                |
| Chloroanthraniliprol      | 483.9>452.9                                                                | 483.9>285.8   | 13.85                 | 96/96               | 23/19               | 24/16                |

|                          |             |             |             |         |       |       |
|--------------------------|-------------|-------------|-------------|---------|-------|-------|
| Chloroxuron              | 291.0>72.0  | 291.0>218.0 | 15.37       | 106/106 | 23/33 | 8/11  |
| Chlorsulfuron            | 358.0>167.0 | 358.0>141.1 | 11.85       | 25/25   | 23/23 | 10/6  |
| Chlortoluron             | 213.1>72.0  | 213.1>46.0  | 11.64       | 76/76   | 21/37 | 10/12 |
| Chromafenozide           | 395.2>175.0 | 395.2>339.1 | 15.99       | 40/40   | 21/11 | 10/19 |
| Cinosulfuron             | 414.0>183.0 | 414.0>215.0 | 10.69       | 76/76   | 23/22 | 10/11 |
| Clodinafop-propargyl     | 350.0>266.0 | 350.0>90.9  | 16.80       | 101/101 | 21/35 | 14/14 |
| Clofentezine             | 303.0>138.0 | 303.0>101.9 | 17.53       | 51/51   | 19/49 | 8/12  |
| Clomazone                | 240.0>125.0 | 240.0>89.0  | 13.41       | 66/66   | 27/65 | 6/10  |
| Clothianidin             | 250.0>169.0 | 250.0>132.0 | 5.80        | 6/6     | 19/21 | 10/6  |
| Crimidin                 | 172.0>106.9 | 172.0>95.1  | 6.98        | 91/91   | 35/31 | 14/8  |
| Cyazofamid               | 325.1>108.0 | 325.1>261.0 | 16.04       | 16/16   | 19/13 | 8/14  |
| Cycloxydim               | 326.2>280.1 | 326.2>180.0 | 18.23       | 91/91   | 19/27 | 14/10 |
| Cycluron                 | 199.1>89.0  | 199.1>72.0  | 12.62       | 71/71   | 21/29 | 10/10 |
| Cyflufenamid             | 413.1>241.0 | 413.1>203.0 | 17.93       | 66/66   | 31/55 | 14/12 |
| Cymoxanil                | 199.0>128.0 | 199.0>111.0 | 7.07        | 81/81   | 13/25 | 4/4   |
| Cyprazine                | 228.1>186.0 | 228.1>108.0 | 12.23       | 96/96   | 25/33 | 10/12 |
| Cyproconazole            | 292.0>70.0  | 292.0>125.0 | 14.89/15.03 | 61/61   | 23/45 | 8/6   |
| Cyprodinil               | 226.1>93.0  | 226.1>77.0  | 15.26       | 71/71   | 43/61 | 12/12 |
| Demeton-S                | 259.0>88.9  | 259.0>61.0  | 13.61       | 21/21   | 21/49 | 14/10 |
| Demeton-S-methyl-sulfone | 263.0>169.0 | 263.0>108.9 | 4.50        | 76/76   | 21/37 | 12/14 |
| Desmedipham              | 318.1>182.1 | 318.1>136.0 | 13.66       | 16/16   | 19/37 | 10/6  |
| Dichlofluanid            | 350.0>223.9 | 350.0>123.0 | 15.67       | 60/60   | 21/39 | 12/6  |
| Diclobutrazol            | 328.0>69.9  | 328.0>159.0 | 16.65       | 85/85   | 58/48 | 8/8   |
| Dicrotophos              | 238.0>112.1 | 238.0>193.0 | 6.06        | 46/46   | 17/13 | 8/10  |
| Diethofencarb            | 268.1>226.1 | 268.1>180.0 | 14.16       | 26/26   | 13/25 | 12/10 |
| Difenoconazole           | 406.0>251.0 | 406.0>188.0 | 18.11       | 96/96   | 35/59 | 14/10 |
| Difenoxyuron             | 287.0>123.0 | 287.0>71.9  | 13.22       | 121/121 | 25/23 | 8/10  |
| Diflubenzuron            | 311.1>158.1 | 311.1>141.0 | 16.19       | 61/61   | 19/47 | 10/8  |
| Diflufenican             | 395.0>266.0 | 395.0>246.0 | 18.50       | 136/136 | 33/47 | 14/14 |
| Dimefuron                | 339.0>166.9 | 339.0>256.0 | 13.96       | 141/141 | 29/23 | 10/14 |
| Dimethachlor             | 256.0>224.0 | 256.0>148.1 | 13.07       | 46/46   | 19/35 | 12/8  |
| Dimethenamide            | 276.0>244.0 | 276.0>168.0 | 14.16       | 51/51   | 19/33 | 14/10 |
| Dimethoate               | 230.0>199.0 | 230.0>125.0 | 6.11        | 21/21   | 13/29 | 12/6  |
| Dimethomorph             | 388.1>301.0 | 388.1>165.1 | 14.79/15.20 | 36/36   | 29/41 | 16/10 |
| Dimoxystrobin            | 327.0>205.0 | 327.0>116.1 | 16.57       | 61/61   | 15/29 | 12/6  |
| Diniconazole             | 326.1>70.1  | 326.1>158.9 | 17.70       | 25/25   | 63/39 | 8/10  |
| Disulfoton               | 275.0>89.0  | 275.0>61.0  | 17.55       | 56/56   | 20/46 | 10/10 |
| Disulfoton-sulfon        | 307.0>96.8  | 307.0>171.0 | 12.39       | 66/66   | 41/16 | 12/9  |
| Diuron                   | 233.0>72.0  | 233.0>46.1  | 11.42       | 86/86   | 23/39 | 8/12  |
| EPN                      | 324.1>295.9 | 324.1>157   | 18.14       | 81/81   | 19/31 | 16/10 |
| Epoxiconazole            | 330.0>121.0 | 330.0>101.1 | 15.99       | 61/61   | 27/65 | 6/6   |
| Etaconazole              | 328.1>159.0 | 328.1>123.0 | 15.76       | 61/61   | 37/75 | 10/6  |

|                        |             |             |       |         |       |       |
|------------------------|-------------|-------------|-------|---------|-------|-------|
| Ethiofencarb           | 226.1>107.1 | 226.1>164.1 | 11.35 | 41/41   | 23/11 | 8/10  |
| Ethiofencarb-sulfone   | 258.0>107.1 | 258.0>200.9 | 5.69  | 51/51   | 21/11 | 8/10  |
| Ethiofencarb-sulfoxide | 242.0>106.9 | 242.0>185.0 | 6.07  | 41/41   | 23/13 | 12/8  |
| Ethiprole              | 397.0>350.8 | 397.0>254.9 | 14.54 | 116/116 | 29/47 | 18/14 |
| Ethirimol              | 210.1>140.1 | 210.1>97.9  | 8.28  | 116/116 | 29/35 | 8/12  |
| Ethofumesate           | 304.0>121.1 | 304.0>161.1 | 14.14 | 44/44   | 27/33 | 6/10  |
| Ethoprophos            | 243.0>130.9 | 243.0>172.9 | 15.71 | 61/61   | 27/21 | 6/10  |
| Etoxazole              | 360.1>141.0 | 360.1>304.0 | 20.38 | 100/100 | 35/25 | 6/16  |
| Famoxadon              | 392.1>331.1 | 392.1>238.1 | 17.59 | 50/50   | 11/23 | 18/14 |
| Fenamidone             | 312.1>92.0  | 312.1>65.0  | 14.57 | 56/56   | 39/71 | 8/10  |
| Fenamiphos             | 304.1>217.0 | 304.1>202.0 | 16.42 | 101/101 | 31/47 | 12/12 |
| Fenazaquin             | 307.1>161.1 | 307.1>147.0 | 21.04 | 71/71   | 23/27 | 10/7  |
| Fenbuconazole          | 337.0>125.1 | 337.0>70.0  | 16.34 | 96/96   | 35/23 | 8/8   |
| Fenchlorazol-ethyl     | 403.9>357.8 | 403.9>375.7 | 17.59 | 116/116 | 31/21 | 18/20 |
| Fenfuram               | 202.0>109.0 | 202.0>120.0 | 10.82 | 91/91   | 27/21 | 8/6   |
| Fenhexamid             | 302.1>97.1  | 302.1>55.0  | 15.59 | 86/86   | 31/57 | 6/8   |
| Fenobucarb             | 208.1>95.1  | 208.1>152.1 | 13.75 | 36/36   | 21/11 | 8/10  |
| Fenoxaprop-ethyl       | 362.0>288.0 | 362.0>121.0 | 18.78 | 116/116 | 25/37 | 16/15 |
| Fenoxycarb             | 302.1>88.0  | 302.1>116.1 | 16.60 | 86/86   | 27/15 | 10/8  |
| Fenpropidin            | 274.4>147.1 | 274.4>116.9 | 13.58 | 151/151 | 39/71 | 8/14  |
| Fenpropimorph          | 304.2>147.1 | 304.2>117.1 | 13.95 | 91/91   | 39/77 | 8/8   |
| Fenpyroximate          | 422.1>366.1 | 422.1>135.0 | 20.82 | 116/116 | 23/41 | 18/8  |
| Fensulfothion-sulfon   | 325.0>268.9 | 325.0>296.9 | 13.47 | 101/101 | 21/15 | 14/18 |
| Fenuron                | 165.1>72.0  | 165.1>46.1  | 5.67  | 91/91   | 21/19 | 10/8  |
| Fipronil               | 454.0>367.9 | 454.0>254.8 | 16.58 | 60/60   | 31/51 | 18/14 |
| Flazasulfuron          | 408.0>182.0 | 408.0>227.0 | 13.79 | 66/66   | 25/28 | 10/17 |
| Flonicamid             | 230.0>173.9 | 230.0>147.9 | 3.40  | 81/81   | 25/37 | 10/8  |
| Fluazifop              | 328.0>282.0 | 328.0>254.0 | 14.55 | 91/91   | 27/35 | 16/14 |
| Flubendiamid           | 700.0>408.0 | 700.0>273.9 | 17.31 | 50/50   | 19/47 | 20/14 |
| Fludioxonil            | 266.1>229.0 | 266.1>157.9 | 14.75 | 65/65   | 17/45 | 12/8  |
| Flufenacet             | 364.0>194.1 | 364.0>152.0 | 15.84 | 56/56   | 15/25 | 10/8  |
| Flumioxazin            | 355.0>327.2 | 355.0>299.0 | 13.86 | 136/136 | 20/38 | 18/16 |
| Fluometuron            | 233.1>72.1  | 233.1>145.1 | 11.41 | 86/86   | 23/47 | 8/8   |
| Fluopicolid            | 383.0>172.9 | 383.0>108.9 | 14.98 | 91/91   | 31/89 | 10/6  |
| Fluoroglycofene-ethyl  | 465.0>343.8 | 465.0>222.9 | 18.77 | 51/51   | 19/45 | 18/12 |
| Fluoxastrobin          | 459.0>427.0 | 459.0>188.0 | 16.08 | 101/101 | 25/45 | 22/10 |
| Fluquinconazole        | 376.0>306.9 | 376.0>349.0 | 15.51 | 26/26   | 35/27 | 18/18 |
| Fluridone              | 330.0>310.0 | 330.0>259.0 | 14.15 | 161/161 | 39/63 | 16/14 |
| Flurochloridone        | 313.0>292.9 | 313.0>53.0  | 15.20 | 146/146 | 31/61 | 16/8  |
| Fluroxypyr-meptyl      | 367.0>255.0 | 367.0>209.0 | 20.23 | 46/46   | 13/33 | 13/12 |
| Flurtamone             | 334.1>247.0 | 334.1>178.1 | 14.54 | 136/136 | 37/59 | 14/10 |
| Flusilazole            | 316.1>247.0 | 316.1>165.1 | 16.49 | 26/26   | 25/35 | 14/10 |

|                      |             |             |       |         |       |       |
|----------------------|-------------|-------------|-------|---------|-------|-------|
| Fluthiacet-methyl    | 404.0>273.9 | 404.0>215.0 | 16.74 | 151/151 | 39/53 | 16/12 |
| Flutolanil           | 324.1>262.0 | 324.1>242.0 | 15.07 | 16/16   | 25/35 | 14/14 |
| Flutriafol           | 302.0>123.0 | 302.0>109.0 | 12.59 | 61/61   | 37/37 | 6/5   |
| Forchlorfenuron      | 248.0>129.0 | 248.0>93.0  | 12.76 | 36/36   | 23/47 | 6/10  |
| Formetanate          | 222.0>165.1 | 222.0>120.1 | 2.14  | 16/16   | 21/35 | 10/7  |
| Fosthiazate          | 284.0>103.9 | 284.0>199.9 | 11.86 | 46/46   | 27/23 | 12/12 |
| Fuberidazole         | 185.0>157.1 | 185.0>65.0  | 6.08  | 96/96   | 31/61 | 10/10 |
| Furalaxyl            | 302.1>242.1 | 302.1>95.0  | 14.38 | 66/66   | 21/33 | 12/8  |
| Furathiocarb         | 383.1>195.0 | 383.1>252.0 | 19.09 | 86/86   | 25/17 | 12/14 |
| Halofenozide         | 331.0>105.0 | 331.0>275.0 | 14.50 | 60/60   | 23/15 | 6/12  |
| Haloxypop-ethoxyetyl | 434.0>315.9 | 434.0>90.9  | 19.03 | 106/106 | 27/45 | 16/14 |
| Haloxypop-metyl      | 376.0>315.9 | 376.0>288.0 | 18.17 | 121/121 | 23/35 | 16/16 |
| Hexaconazole         | 314.1>70.0  | 314.1>159.0 | 17.20 | 21/21   | 49/37 | 8/10  |
| Hexaflumuron         | 461.0>158.1 | 461.0>141.0 | 18.84 | 111/111 | 23/63 | 10/8  |
| Hexazinone           | 253.1>171.0 | 253.1>71.0  | 10.42 | 66/66   | 23/41 | 10/12 |
| Hexythiazox          | 353.0>228.0 | 353.0>168.0 | 19.74 | 66/66   | 21/35 | 12/10 |
| Imazalil             | 297.0>159.0 | 297.0>201.0 | 12.15 | 81/81   | 31/23 | 10/10 |
| Imidacloprid         | 256.0>209.1 | 256.0>175.1 | 6.07  | 80/80   | 21/27 | 12/10 |
| Indoxacarb           | 528.0>202.9 | 528.0>56.0  | 18.65 | 91/91   | 55/75 | 12/14 |
| Iodosulfuron-methyl  | 507.9>167.0 | 507.9>141.0 | 13.89 | 71/71   | 25/40 | 10/8  |
| Ipconazole           | 334.1>70.0  | 334.1>124.9 | 18.37 | 71/71   | 61/57 | 8/6   |
| Iprovalicarb         | 321.2>119.1 | 321.2>203.2 | 15.58 | 61/61   | 23/12 | 8/10  |
| Isocarboxiphos       | 307.0>231.0 | 307.0>272.9 | 13.04 | 50/50   | 21/9  | 12/14 |
| Isoprocab            | 194.1>95.0  | 194.1>137.0 | 12.07 | 36/36   | 21/13 | 16/8  |
| Isoprothiolane       | 291.0>231.0 | 291.0>188.9 | 15.05 | 21/21   | 15/29 | 12/10 |
| Isoproturon          | 207.1>72.0  | 207.1>46.1  | 12.44 | 91/91   | 23/37 | 10/10 |
| Isoxaben             | 333.1>165.0 | 333.1>106.9 | 15.20 | 71/71   | 25/81 | 10/12 |
| Isoxadifen-ethyl     | 313.2>232.1 | 313.2>204.2 | 16.69 | 34/34   | 27/39 | 12/12 |
| Isoxaflutole         | 360.1>251.0 | 377.1>251.0 | 12.99 | 100/55  | 19/27 | 14/14 |
| Kresoxim-methyl      | 314.1>206.0 | 314.1>116.1 | 16.67 | 70/70   | 10/19 | 10/8  |
| Lenacil              | 235.1>153.0 | 235.1>136.0 | 12.45 | 66/66   | 21/45 | 8/8   |
| Linuron              | 249.0>160.0 | 249.0>182.0 | 13.70 | 61/61   | 25/21 | 10/10 |
| Lufenuron            | 511.0>158.1 | 511.0>140.9 | 20.03 | 111/111 | 25/73 | 10/8  |
| Mandipropamid        | 412.1>328.0 | 412.1>356.0 | 15.30 | 96/96   | 21/15 | 18/18 |
| Mefenacet            | 299.1>148.0 | 299.1>120.1 | 15.37 | 51/51   | 19/35 | 8/8   |
| Mefenpyr-diethyl     | 373.1>326.9 | 373.1>160.1 | 17.37 | 70/70   | 23/47 | 16/10 |
| Mepanipyrim          | 224.0>106.0 | 224.0>66.0  | 15.34 | 131/131 | 33/59 | 18/10 |
| Mepronil             | 270.1>119.1 | 270.1>228.0 | 14.94 | 91/91   | 31/20 | 8/12  |
| Mesosulfuron-methyl  | 504.0>182.0 | 504.0>83.0  | 13.08 | 101/101 | 29/81 | 10/10 |
| Metalaxyl            | 280.1>220.1 | 280.1>160.1 | 12.90 | 41/41   | 19/31 | 12/10 |
| Metamitron           | 203.1>175.1 | 203.1>104.0 | 5.88  | 96/96   | 23/31 | 10/12 |
| Metazachlor          | 278.0>210.0 | 278.0>134.1 | 12.59 | 16/16   | 15/29 | 12/8  |

|                     |             |             |       |         |       |       |
|---------------------|-------------|-------------|-------|---------|-------|-------|
| Metconazole         | 320.1>70.0  | 320.1>124.9 | 17.32 | 56/56   | 63/55 | 8/6   |
| Methabenzthiazuron  | 222.1>165.0 | 222.1>150.0 | 12.12 | 46/46   | 23/43 | 10/8  |
| Methacrifos         | 241.0>124.9 | 241.0>209.0 | 13.33 | 46/46   | 25/11 | 6/12  |
| Methamidophos       | 142.0>94.0  | 142.0>124.9 | 0.63  | 36/36   | 21/19 | 6/6   |
| Methfuroxam         | 230.0>137.0 | 230.0>111.1 | 13.32 | 81/81   | 27/21 | 8/8   |
| Methiocarb          | 226.1>169.0 | 226.1>121.0 | 14.14 | 41/41   | 13/25 | 10/6  |
| Methiocarb-sulfon   | 258.0>122.0 | 258.0>201.1 | 7.93  | 81/81   | 25/13 | 6/4   |
| Methiocarb-sulfoxid | 242.0>185.0 | 242.0>122.1 | 7.10  | 56/56   | 19/39 | 10/8  |
| Methomyl            | 163.0>88.0  | 163.0>105.9 | 3.73  | 6/6     | 13/13 | 10/12 |
| Methoprotryne       | 272.1>198.1 | 272.1>240.1 | 12.78 | 81/81   | 31/25 | 12/12 |
| Methoxyfenozide     | 369.1>149.0 | 369.1>133.0 | 15.44 | 46/46   | 23/34 | 8/7   |
| Metobromuron        | 259.0>169.9 | 259.0>148.0 | 11.68 | 66/66   | 25/21 | 10/8  |
| Metolcarb           | 166.0>109.1 | 166.0>94.0  | 8.89  | 26/26   | 15/41 | 8/14  |
| Metosulam           | 418.0>175.0 | 418.0>140.0 | 11.77 | 106/106 | 33/71 | 10/8  |
| Metoxuron           | 229.0>72.0  | 229.0>46.1  | 8.83  | 76/76   | 21/37 | 8/8   |
| Metrafenone         | 409.0>209.0 | 409.0>226.9 | 17.75 | 61/61   | 19/27 | 12/12 |
| Metribuzin          | 215.1>187.1 | 215.1>84.1  | 9.49  | 96/96   | 25/27 | 10/10 |
| Metsulfuron-methyl  | 382.0>167.0 | 382.0>198.9 | 11.28 | 61/61   | 21/29 | 10/12 |
| Mevinphos           | 225.0>127.0 | 225.0>193.0 | 8.28  | 41/41   | 23/11 | 6/10  |
| Mexacarbate         | 223.1>166.0 | 223.1>151.1 | 5.51  | 21/21   | 19/31 | 8/8   |
| Monocrotophos       | 224.0>127.0 | 224.0>98.1  | 5.09  | 41/41   | 23/17 | 6/8   |
| Monolinuron         | 215.0>125.9 | 215.0>99.0  | 10.98 | 61/61   | 23/45 | 6/12  |
| Monuron             | 199.1>71.9  | 199.1>126.0 | 9.30  | 76/76   | 21/33 | 10/6  |
| Myclobutanil        | 289.0>70.0  | 289.0>125.0 | 15.24 | 71/71   | 23/45 | 8/8   |
| Neburon             | 275.0>88.1  | 275.0>114.1 | 16.44 | 101/101 | 21/21 | 10/8  |
| Nicosulfuron        | 411.1>182.1 | 411.1>213.1 | 10.84 | 86/86   | 27/23 | 10/12 |
| Nitenpyram          | 271.1>126.1 | 271.1>237.1 | 3.47  | 61/61   | 37/25 | 8/11  |
| Norflurazon         | 304.1>283.9 | 304.0>160.0 | 13.10 | 131/131 | 33/43 | 16/10 |
| Omethoate           | 214.0>124.9 | 214.0>182.9 | 1.90  | 46/46   | 29/15 | 6/10  |
| Oxadixyl            | 279.1>219.1 | 279.1>133.1 | 9.81  | 46/46   | 15/29 | 12/8  |
| Oxamyl              | 237.0>72.0  | 237.0>90.0  | 3.68  | 25/25   | 31/11 | 8/8   |
| Oxamyl-oxime        | 163.0>72.1  | 163.0>90.0  | 1.77  | 46/46   | 17/23 | 6/14  |
| Oxycarboxin         | 268.0>174.9 | 268.0>147.0 | 7.28  | 66/66   | 31/21 | 10/10 |
| Oxydemeton-methyl   | 247.0>169.0 | 247.0>124.9 | 4.31  | 41/41   | 19/29 | 10/6  |
| Paclobutrazol       | 294.0>70.0  | 294.0>125.1 | 14.82 | 66/66   | 51/49 | 10/8  |
| Penconazole         | 284.0>70.0  | 284.0>158.9 | 16.66 | 56/56   | 21/35 | 8/8   |
| Pencycuron          | 329.0>124.9 | 331.0>126.9 | 17.89 | 70/70   | 29/31 | 6/6   |
| Pendimethalin       | 282.0>212.0 | 282.0>194.0 | 19.63 | 16/16   | 15/25 | 12/10 |
| Petoxamid           | 296.1>131.1 | 296.1>250.0 | 15.77 | 11/11   | 27/17 | 6/14  |
| Phenmedipham        | 301.1>168.1 | 301.1>136.0 | 13.87 | 76/76   | 13/29 | 10/8  |
| Phenthoate          | 321.0>79.0  | 321.0>163.0 | 16.71 | 46/46   | 57/16 | 10/8  |
| Phorate-sulfon      | 293.0>171.0 | 293.0>96.8  | 12.28 | 51/51   | 15/47 | 8/14  |

|                      |             |             |             |         |        |       |
|----------------------|-------------|-------------|-------------|---------|--------|-------|
| Phorate-sulfoxid     | 277.0>198.9 | 277.0>142.9 | 12.02       | 31/31   | 13/27  | 12/8  |
| Phosmet              | 318.0>160.0 | 318.0>133.0 | 13.73       | 46/46   | 17/51  | 10/6  |
| Phoxim               | 299.0>77.0  | 299.0>129.0 | 17.58       | 46/46   | 43/15  | 12/6  |
| Picoxystrobin        | 368.0>205.0 | 368.0>145.0 | 16.77       | 36/36   | 13/29  | 12/8  |
| Piperonyl butoxide   | 356.2>177.0 | 356.2>119.1 | 19.35       | 26/26   | 17/47  | 10/8  |
| Pirimicarb           | 239.1>72.0  | 239.1>182.1 | 8.66        | 56/56   | 37/21  | 10/10 |
| Pirimicarb-desmethyl | 225.1>72.0  | 225.1>168.0 | 6.05        | 56/56   | 33/19  | 12/10 |
| Prochloraz           | 376.0>307.9 | 376.0>70.0  | 17.12       | 16/16   | 17/29  | 16/10 |
| Promecarb            | 208.1>151.0 | 208.1>109.1 | 14.54       | 26/26   | 13/23  | 8/8   |
| Prometon             | 226.1>142.0 | 226.1>184.1 | 11.21       | 81/81   | 31/25  | 8/10  |
| Prometryn            | 242.1>158.0 | 242.1>200.1 | 13.97       | 76/76   | 31/25  | 10/12 |
| Propamocarb          | 189.2>102.1 | 189.2>74.0  | 1.91        | 61/61   | 25/35  | 8/12  |
| Propaquizafop        | 444.1>100.0 | 444.1>299.0 | 19.22       | 116/116 | 23/31  | 16/16 |
| Propargite           | 368.1>231.1 | 368.1>175.1 | 20.31       | 41/41   | 13/21  | 12/10 |
| Propham              | 180.1>138.0 | 180.1>91.9  | 11.79       | 50/50   | 13/31  | 8/10  |
| Propiconazole        | 342.0>159.0 | 342.0>69.0  | 17.08       | 100/100 | 37/23  | 10/8  |
| Propoxur             | 210.1>111.1 | 210.1>168.0 | 10.15       | 21/21   | 19/11  | 8/10  |
| Propyzamide          | 256.0>189.9 | 256.0>172.9 | 14.41       | 66/66   | 19/31  | 12/10 |
| Proquinazid          | 373.0>288.9 | 373.0>330.9 | 20.35       | 71/71   | 33/19  | 16/18 |
| Prosulfocarb         | 252.1>91.0  | 252.1>128.1 | 18.43       | 66/66   | 35/17  | 10/6  |
| Prosulfuron          | 420.0>141.0 | 420.0>167.0 | 14.66       | 76/76   | 25/25  | 8/10  |
| Pyracarbolid         | 218.1>125.0 | 218.1>97.0  | 10.38       | 21/21   | 25/36  | 6/6   |
| Pyraclostrobin       | 388.0>194.1 | 388.0>163.1 | 17.66       | 41/41   | 17/33  | 12/10 |
| Pyrimethanil         | 200.1>107.0 | 200.1>82.0  | 12.21       | 96/96   | 33/32  | 12/9  |
| Pyriproxyfen         | 322.0>96.1  | 322.0>185.0 | 19.52       | 61/61   | 21/31  | 8/10  |
| Qinoxyfen            | 308.0>196.9 | 308.0>162.0 | 19.37       | 46/46   | 43/59  | 10/8  |
| Quinalphos           | 299.0>163.0 | 299.0>147.0 | 16.55       | 66/66   | 31/31  | 10/8  |
| Quinoclamine         | 208.0>104.9 | 208.0>76.9  | 9.57        | 96/96   | 33/53  | 16/10 |
| Rimsulfuron          | 432.0>182.0 | 432.0>325.0 | 11.96       | 76/76   | 29/21  | 10/18 |
| Rotenone             | 395.1>213.0 | 395.1>192.1 | 16.61       | 136/136 | 31/33  | 12/10 |
| Secbumeton           | 226.1>170.1 | 226.1>100   | 11.2/11.45  | 81/81   | 25/39  | 10/12 |
| Siduron              | 233.1>137.0 | 233.1>94.1  | 14.07/14.33 | 96/96   | 23/29  | 8/8   |
| Simazine             | 202.1>132.0 | 202.1>104.0 | 10.13       | 61/61   | 25/33  | 8/12  |
| Simetryn             | 214.1>124.1 | 214.1>144.0 | 10.23       | 86/86   | 27/28  | 8/7   |
| Spinosyn A           | 732.4>142.1 | 732.4>98.0  | 18.01       | 136/136 | 35/103 | 8/16  |
| Spinosyn D           | 746.4>142.1 | 746.4>98.1  | 18.70       | 146/146 | 35/101 | 8/16  |
| Spirodiclofen        | 411.1>313.0 | 411.1>71.0  | 20.72       | 80/80   | 17/29  | 18/8  |
| Spiromesifen         | 371.1>273.1 | 371.1>255.1 | 20.28       | 71/71   | 15/31  | 14/14 |
| Spirotetramat        | 374.1>302.0 | 374.1>330.1 | 16.00       | 131/131 | 23/21  | 16/20 |
| Spiroxamine          | 298.1>144.1 | 298.1>100.0 | 14.42       | 71/71   | 27/43  | 8/12  |
| Sulfentrazone        | 387.0>306.9 | 387.0>145.9 | 11.31       | 146/146 | 29/55  | 16/8  |
| Sulfometuron-methyl  | 365.0>150.0 | 365.0>107.0 | 11.23       | 66/66   | 23/59  | 8/12  |

|                       |             |             |             |         |       |       |
|-----------------------|-------------|-------------|-------------|---------|-------|-------|
| Sulfosulfuron         | 471.0>211.0 | 471.0>261.0 | 14.11       | 76/76   | 19/23 | 12/12 |
| Tebuconazol           | 308.1>70.0  | 308.1>125.1 | 16.83       | 41/41   | 57/59 | 8/8   |
| Tebufenozide          | 353.1>133.1 | 353.1>297.1 | 16.74       | 41/41   | 25/11 | 6/16  |
| Tebufenpyrad          | 334.1>117.1 | 334.1>145.0 | 19.18       | 121/121 | 45/35 | 8/9   |
| Tebuthiuron           | 229.1>172.1 | 229.1>116.0 | 10.85       | 81/81   | 25/35 | 10/8  |
| Teflubenzuron         | 381.0>158.0 | 381.0>141.0 | 19.18       | 81/81   | 21/49 | 10/8  |
| Tepraloxydim          | 342.1>250.1 | 342.1>166.0 | 15.54       | 86/86   | 19/29 | 14/10 |
| Terbumeton            | 226.0>170.0 | 226.0>114.1 | 11.19/11.44 | 81/81   | 25/33 | 10/8  |
| Terbuthylazine        | 230.1>174.0 | 230.1>104.0 | 14.36       | 51/51   | 23/43 | 10/12 |
| Terbutryne            | 242.1>186.1 | 242.1>91.0  | 14.19       | 76/76   | 25/35 | 10/10 |
| Tetraconazole         | 372.0>159.0 | 372.0>70.0  | 16.00       | 26/26   | 37/73 | 10/10 |
| Thiabendazol          | 202.0>175.0 | 202.0>131.1 | 5.50        | 121/121 | 37/45 | 10/8  |
| Thiacloprid           | 253.0>126.0 | 253.0>72.9  | 8.22        | 96/96   | 29/81 | 6/8   |
| Thiamethoxam          | 292.0>211.0 | 292.0>181.0 | 4.35        | 61/61   | 17/31 | 12/10 |
| Thifensulfuron-methyl | 388.0>167.0 | 388.0>204.9 | 10.89       | 61/61   | 21/35 | 8/12  |
| Thiobencarb           | 258.1>125.0 | 258.1>89.0  | 17.53       | 36/36   | 25/69 | 6/10  |
| Thiodicarb            | 355.0>88.0  | 355.0>108.0 | 12.70       | 51/51   | 27/21 | 10/8  |
| Thiofanox-sulfone     | 268.1>75.9  | 251.1>75.9  | 6.42        | 50/50   | 15/15 | 10/10 |
| Thiofanox-sulfoxide   | 252.1>104.0 | 252.1>57.0  | 6.09        | 50/50   | 16/35 | 9/8   |
| Thiophanate-methyl    | 343.0>151.0 | 343.0>192.0 | 10.47       | 81/81   | 27/21 | 8/10  |
| Tolclofos-methyl      | 301.0>268.9 | 301.0>174.9 | 17.47       | 61/61   | 23/35 | 14/10 |
| Tolyfluanid           | 364.0>238.0 | 364.0>137.0 | 16.91       | 100/100 | 19/39 | 12/8  |
| Tralkoxydim           | 330.1>284.1 | 330.1>138   | 19.67       | 76/76   | 17/27 | 14/6  |
| Triadimefon           | 294.1>197.1 | 294.1>225   | 15.09       | 51/51   | 21/17 | 12/11 |
| Triadimenol           | 296.0>70.0  | 296.0>227.0 | 15.34       | 56/56   | 19/15 | 8/8   |
| Triasulfuron          | 402.0>167.1 | 402.0>141.0 | 11.02       | 81/81   | 23/27 | 10/8  |
| Triazoxide            | 248.0>95.0  | 248.0>68.0  | 10.57       | 141/141 | 36/35 | 7/8   |
| Tribenuron-methyl     | 396.0>155.0 | 396.0>181.0 | 13.05       | 76/76   | 19/27 | 8/10  |
| Tricyclazole          | 190.0>163.0 | 190.0>136.0 | 8.62        | 96/96   | 31/39 | 10/8  |
| Trifloxystrobin       | 409.1>186.0 | 409.1>206.1 | 18.57       | 61/61   | 25/19 | 10/12 |
| Triflumizole          | 346.0>278.0 | 346.0>73.0  | 18.26       | 25/25   | 15/21 | 18/10 |
| Triflumuron           | 359.0>156.0 | 359.0>139.0 | 17.67       | 56/56   | 21/45 | 10/8  |
| Triflusaluron-methyl  | 493.0>264.0 | 493.0>238.0 | 15.32       | 76/76   | 29/35 | 14/12 |
| Triforine             | 434.9>389.8 | 434.9>98.0  | 13.89/14.22 | 60/60   | 17/43 | 20/14 |
| Triticonazole         | 318.0>70.0  | 318.0>125.0 | 15.71       | 71/71   | 49/47 | 8/8   |
| Uniconazole           | 292.1>70.0  | 292.1>125.0 | 16.18       | 106/106 | 59/37 | 10/8  |
| Vamidothion           | 288.0>146.0 | 288.0>117.9 | 7.10        | 36/36   | 17/33 | 8/9   |
| Zoxamide              | 336.1>186.9 | 336.1>159   | 16.90       | 46/46   | 31/55 | 10/10 |
| Carbendazim-D4        | 196.1>164.1 | 196.1>136.1 | 4.10        | 66/66   | 25/41 | 10/8  |
| Atrazine-D5           | 221.1>179.1 | 221.1>69.0  | 12.08       | 101/101 | 25/51 | 10/10 |
| Linuron-D6            | 255.0>160.0 | 255.0>185.0 | 13.64       | 81/81   | 25/21 | 10/10 |

<sup>1</sup>Retention time (RT); <sup>2</sup>Declustering potential (DP); <sup>3</sup>Collision energy (CE); <sup>4</sup>Cell exit potential (CXP).



**Table S2.** Retention times (RT) and detector type of each pesticide analysed by GC-ECD/NPD.

| GC system           |           | GC Agilent 6890N with electron capture<br>and nitrogen–phosphorus detectors |
|---------------------|-----------|-----------------------------------------------------------------------------|
| Injection Mode      | Splitless |                                                                             |
| Target compound     | Detector  | RT <sup>1</sup> (min)                                                       |
| Acetochlor          | ECD/NPD   | 14.741                                                                      |
| Acrinathrin         | ECD/NPD   | 20.853/21.151                                                               |
| Aldrin              | ECD       | 15.789                                                                      |
| Azinphos-ethyl      | ECD/NPD   | 21.656                                                                      |
| Azinphos-methyl     | ECD/NPD   | 20.813                                                                      |
| Bifenthrin          | ECD       | 19.781                                                                      |
| Bromophos-ethyl     | ECD/NPD   | 16.899                                                                      |
| Bromophos-methyl    | ECD/NPD   | 16.114                                                                      |
| Bromopropylate      | ECD       | 19.913                                                                      |
| Captan              | ECD       | 16.621                                                                      |
| Chlorfenvinphos     | ECD/NPD   | 16.463                                                                      |
| Chlorothalonil      | ECD       | 14.204                                                                      |
| Chlorpropham        | NPD       | 12.174                                                                      |
| Chlorpyrifos        | ECD/NPD   | 15.666                                                                      |
| Chlorpyrifos-methyl | ECD/NPD   | 14.820                                                                      |
| Chlzolinate         | ECD/NPD   | 16.387                                                                      |
| Cyanazine           | ECD/NPD   | 15.663                                                                      |
| Cyfluthrin          | ECD       | 23.294/23.461/23.700                                                        |
| Beta-Cyfluthrin     | ECD       | 23.289/23.464/23.705                                                        |
| Lambda-Cyhalothrin  | ECD       | 20.742/21.011                                                               |
| Alpha-Cypermethrin  | ECD       | 23.983/24.380                                                               |
| Cypermethrin        | ECD       | 23.981/24.181/24.417                                                        |
| Zeta-Cypermethrin   | ECD       | 23.984/24.251/24.395                                                        |
| DDD-p,p'            | ECD       | 18.310                                                                      |
| DDE-p,p'            | ECD       | 17.535                                                                      |
| DDT-o,p'            | ECD       | 18.388                                                                      |
| DDT-p,p'            | ECD       | 18.986                                                                      |
| Deltamethrin        | ECD       | 28.031/28.765                                                               |
| Diazinon            | ECD/NPD   | 13.754                                                                      |
| Dichloran           | ECD       | 13.194                                                                      |
| Dicofol             | ECD       | 15.865                                                                      |
| Dieldrin            | ECD       | 17.703                                                                      |
| Alpha-Endosulfan    | ECD       | 17.223                                                                      |
| Beta-Endosulfan     | ECD       | 18.272                                                                      |
| Endosulfan-sulfate  | ECD       | 19.021                                                                      |
| Endrin              | ECD       | 18.119                                                                      |

|                         |         |               |
|-------------------------|---------|---------------|
| Esfenvalerate           | ECD     | 26.357/26.955 |
| Ethion                  | ECD/NPD | 18.291        |
| Fenarimol               | ECD/NPD | 21.452        |
| Fenchlorphos            | ECD/NPD | 15.110        |
| Fenitrothion            | ECD/NPD | 15.320        |
| Fenpropathrin           | ECD/NPD | 19.977        |
| Fenthion                | NPD     | 15.637        |
| Fenvalerate             | ECD     | 26.419/27.018 |
| Tau-Fluvalinate         | ECD     | 26.942/27.020 |
| Folpet                  | ECD     | 16.755        |
| Formothion              | ECD/NPD | 14.367        |
| Alpha-HCH               | ECD     | 12.966        |
| Beta-HCH                | ECD     | 13.538        |
| Gamma-HCH (Lindane)     | ECD     | 13.640        |
| Heptachlor              | ECD     | 15.092        |
| Heptachlor endo-epoxide | ECD     | 16.602        |
| Heptachlor exo-epoxide  | ECD     | 16.523        |
| Heptenophos             | NPD     | 11.359        |
| Hexachlorobenzene (HCB) | ECD     | 13.169        |
| Imibenconazole          | ECD     | 32.431        |
| Iprodione               | ECD/NPD | 18.167        |
| Isofenphos              | ECD/NPD | 16.462        |
| Isofenphos-methyl       | ECD/NPD | 16.195        |
| Malaoxon                | ECD/NPD | 14.677        |
| Malathion               | ECD/NPD | 15.434        |
| Mecarbam                | ECD/NPD | 16.454        |
| Methidathion            | ECD/NPD | 16.867        |
| Methoxychlor            | ECD     | 20.005        |
| Metolachlor             | ECD/NPD | 15.671        |
| Napropamide             | NPD     | 17.247        |
| Nitrofen                | ECD     | 17.953        |
| Parathion               | ECD/NPD | 15.745        |
| Parathion-methyl        | ECD/NPD | 14.820        |
| Permethrin              | ECD     | 22.239/22.450 |
| Phosalone               | ECD/NPD | 20.684        |
| Pirimiphos-ethyl        | NPD     | 15.991        |
| Pirimiphos-methyl       | NPD     | 15.229        |
| Procyazine              | ECD/NPD | 16.857        |
| Procymidone             | ECD/NPD | 16.646        |
| Profenofos              | ECD/NPD | 17.417        |
| Propachlor              | ECD/NPD | 11.865        |
| Propazine               | ECD/NPD | 13.354        |

---

|                   |         |               |
|-------------------|---------|---------------|
| Pyrazophos        | ECD/NPD | 21.436        |
| Pyridaben         | ECD/NPD | 22.587        |
| Quintozene        | ECD     | 13.741        |
| Tefluthrin        | ECD     | 13.921        |
| Tetrachlorvinphos | ECD/NPD | 17.996        |
| Tetradifon        | ECD     | 20.559        |
| Tetramethrin      | ECD     | 19.682/19.801 |
| Triazophos        | NPD     | 18.470        |
| Trichlorfon       | ECD/NPD | 7.354         |
| Trifluralin       | ECD/NPD | 12.367        |
| Vinclozolin       | ECD/NPD | 14.789        |

---

<sup>1</sup> Retention time (RT).

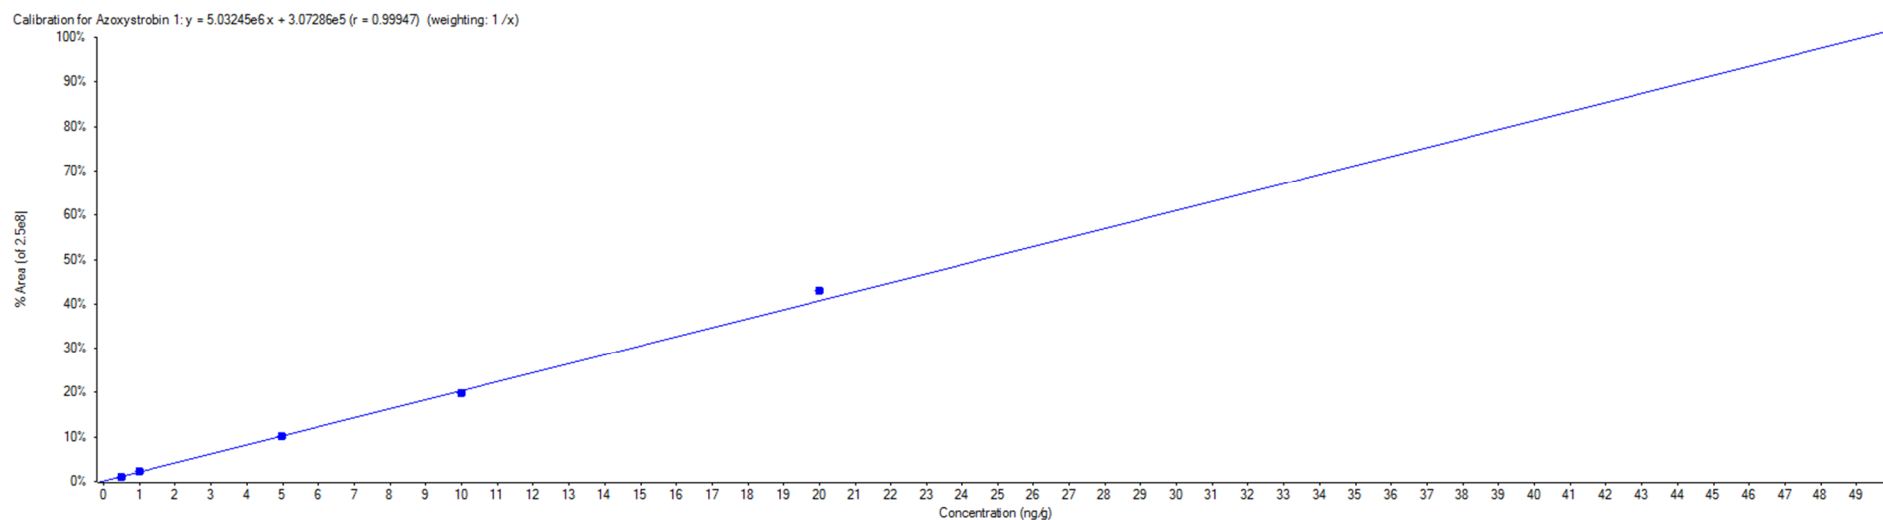

(a)

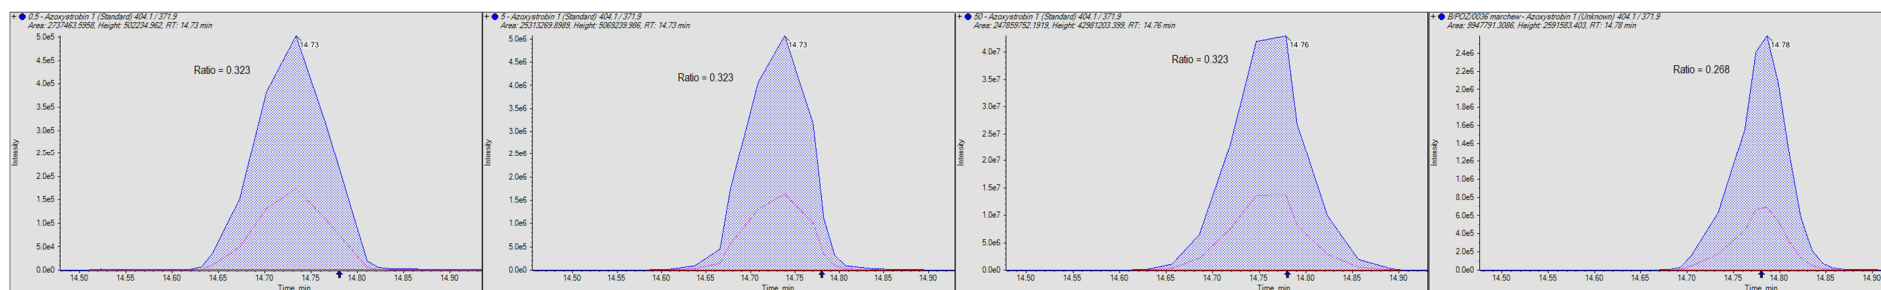

(b)

(c)

(d)

(e)

**Figure S1.** Calibration curve and extracted ion chromatograms of azoxystrobin (MultiQuant software): (a) Calibration curve (0.5–50 ng/mL); (b) Extracted ion chromatogram at 0.5 ng/mL; (c) Extracted ion chromatogram at 5 ng/mL; (d) Extracted ion chromatogram at 50 ng/mL; (e) Extracted ion chromatogram of azoxystrobin residues at 0.019 mg/kg (the carrot sample).

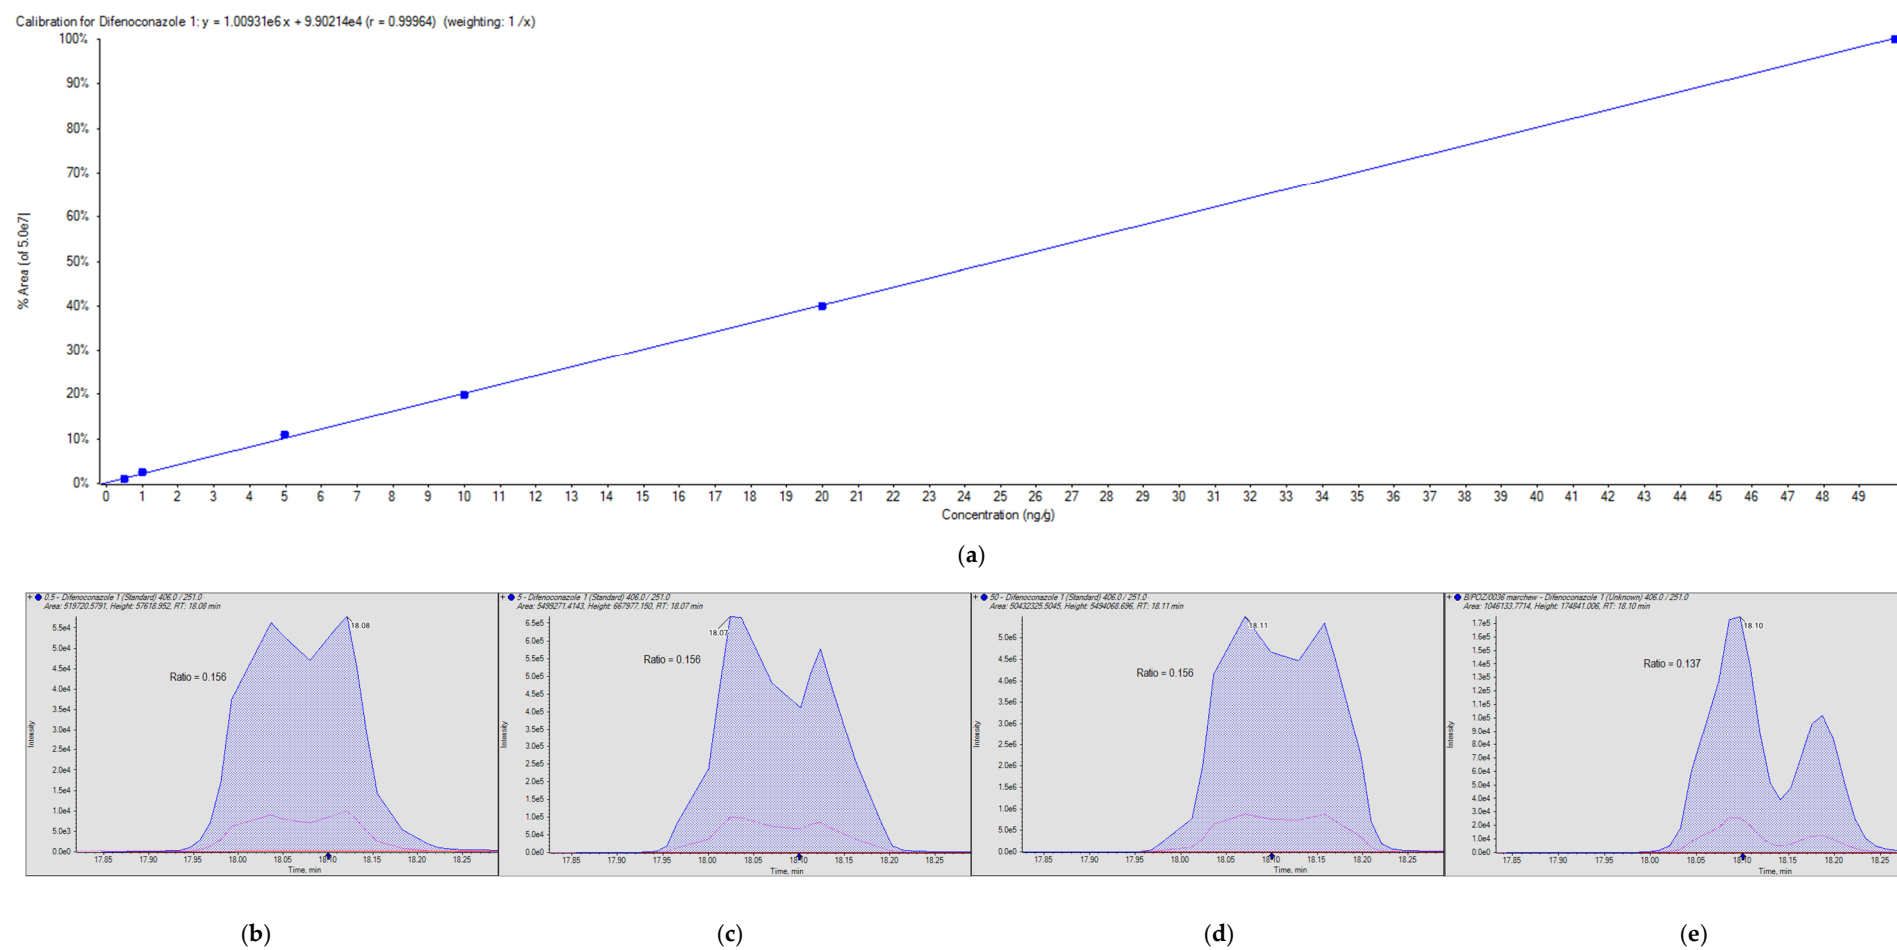

**Figure S2.** Calibration curve and extracted ion chromatograms of difenoconazole (MultiQuant software): (a) Calibration curve (0.5–50 ng/mL); (b) Extracted ion chromatogram at 0.5 ng/mL; (c) Extracted ion chromatogram at 5 ng/mL; (d) Extracted ion chromatogram at 50 ng/mL; (e) Extracted ion chromatogram of difenoconazole residues at 0.010 mg/kg (the carrot sample).

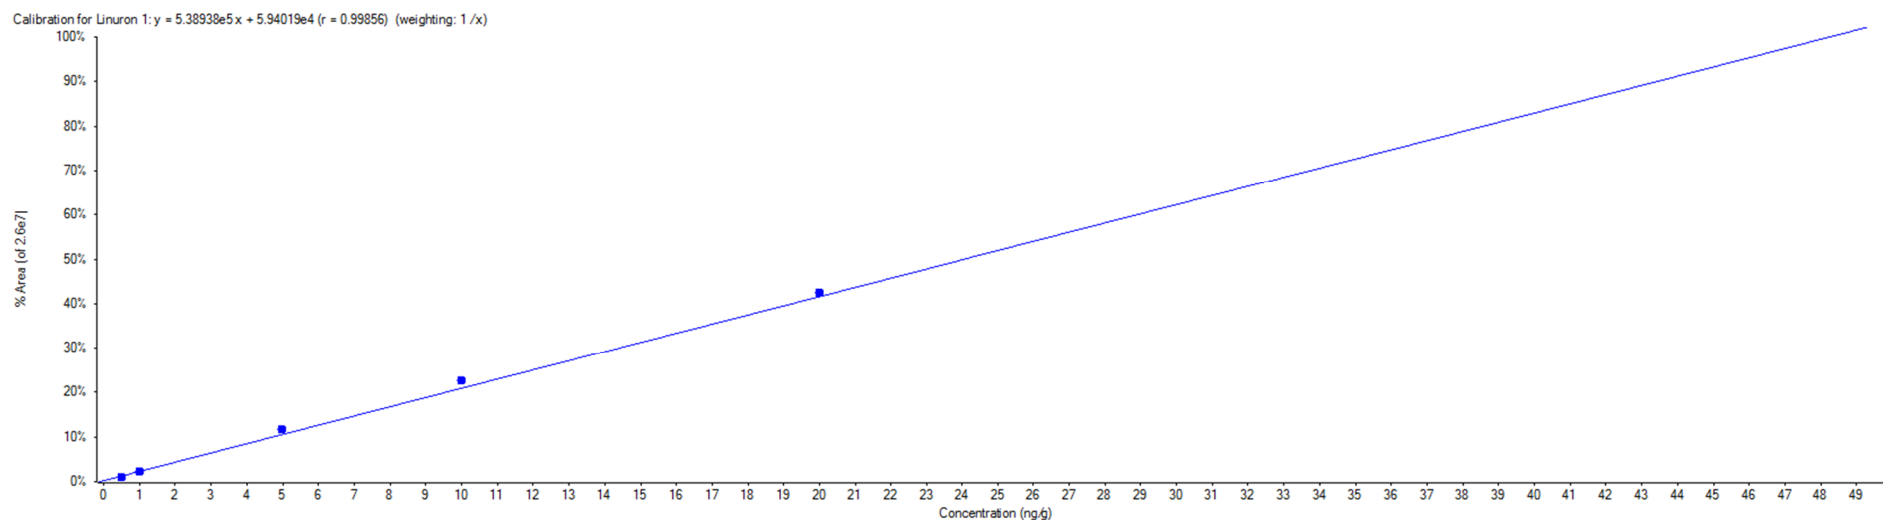

(a)

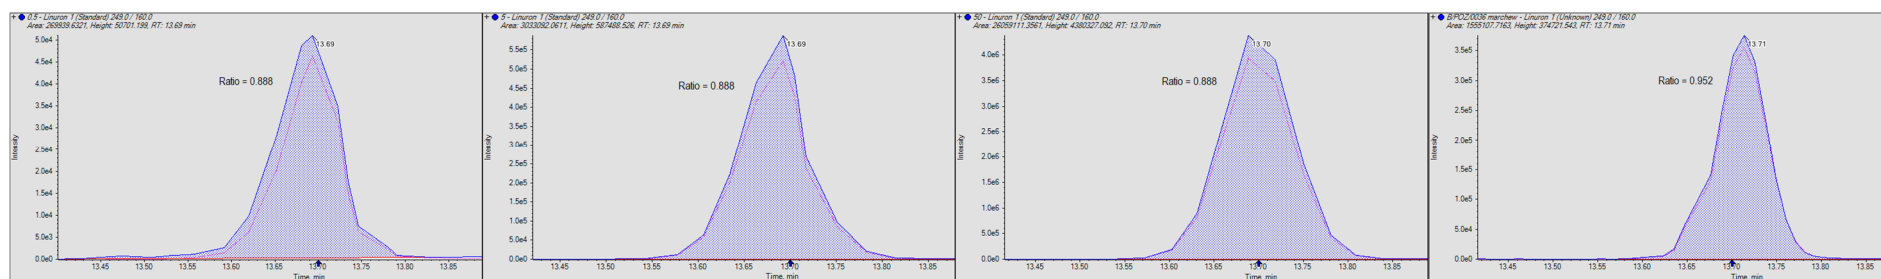

(b)

(c)

(d)

(e)

**Figure S3.** Calibration curve and extracted ion chromatograms of linuron (MultiQuant software): (a) Calibration curve (0.5–50 ng/mL); (b) Extracted ion chromatogram at 0.5 ng/mL; (c) Extracted ion chromatogram at 5 ng/mL; (d) Extracted ion chromatogram at 50 ng/mL; (e) Extracted ion chromatogram of linuron residues at 0.027 mg/kg (the carrot sample).
